# Supplementary material for: Multi-energy calibration and aerosol dilution as analytical strategies to access the in vitro bioaccessibility of essential elements and arsenic in raw and cooked shrimp by plasma-based methods
Source: Royal Society of Chemistry journal article supplement (doi:10.1039/d2ja00396a), 2023-01-01
Supplement: d2ja00396a1.pdf [file d2ja00396a1.pdf]

**Multi-energy calibration and aerosol dilution as analytical strategies to access the in vitro bioaccessibility of essential elements and arsenic in raw and cooked shrimp by plasma-based methods**

Herick Macedo Santos<sup>a,b</sup>, Julymar Marcano de Higuera<sup>a,b</sup> and Ana Rita de Araújo Nogueira<sup>b</sup>

**Supplementary Material**

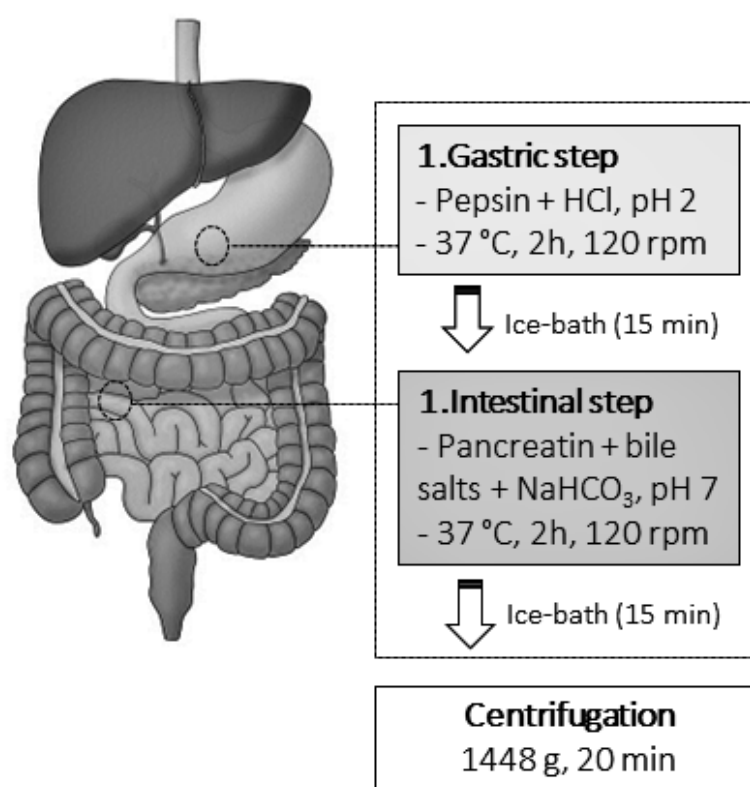

Figure S1. Schematic representation of the in vitro digestion model

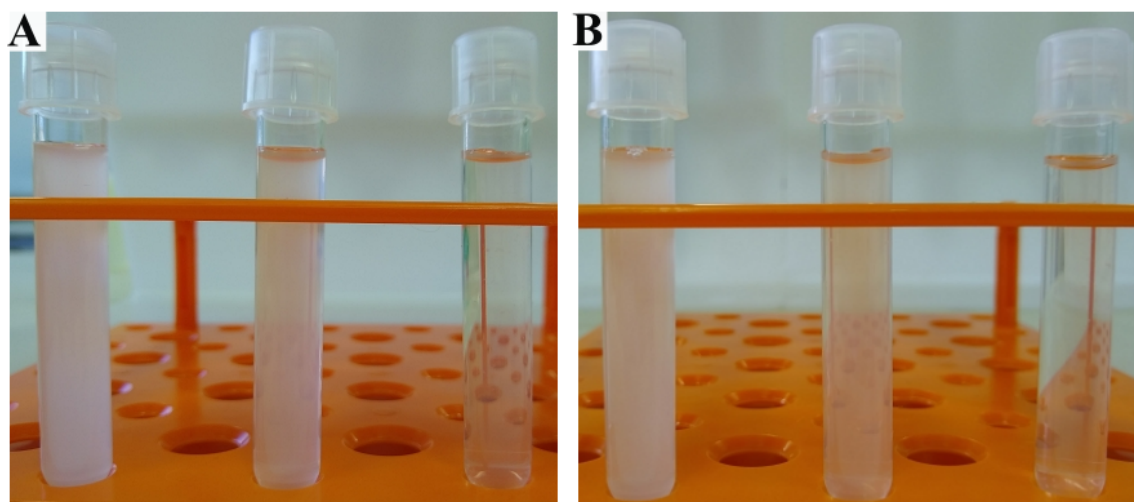

Figure S2. Physical aspect of the chyme after dilution in 1 % v v<sup>-1</sup> HNO<sub>3</sub>. (A) raw sample. (B) cooked sample. Dilution factors at 1:2.5, 1:5, and 1:10 are shown from left to right.

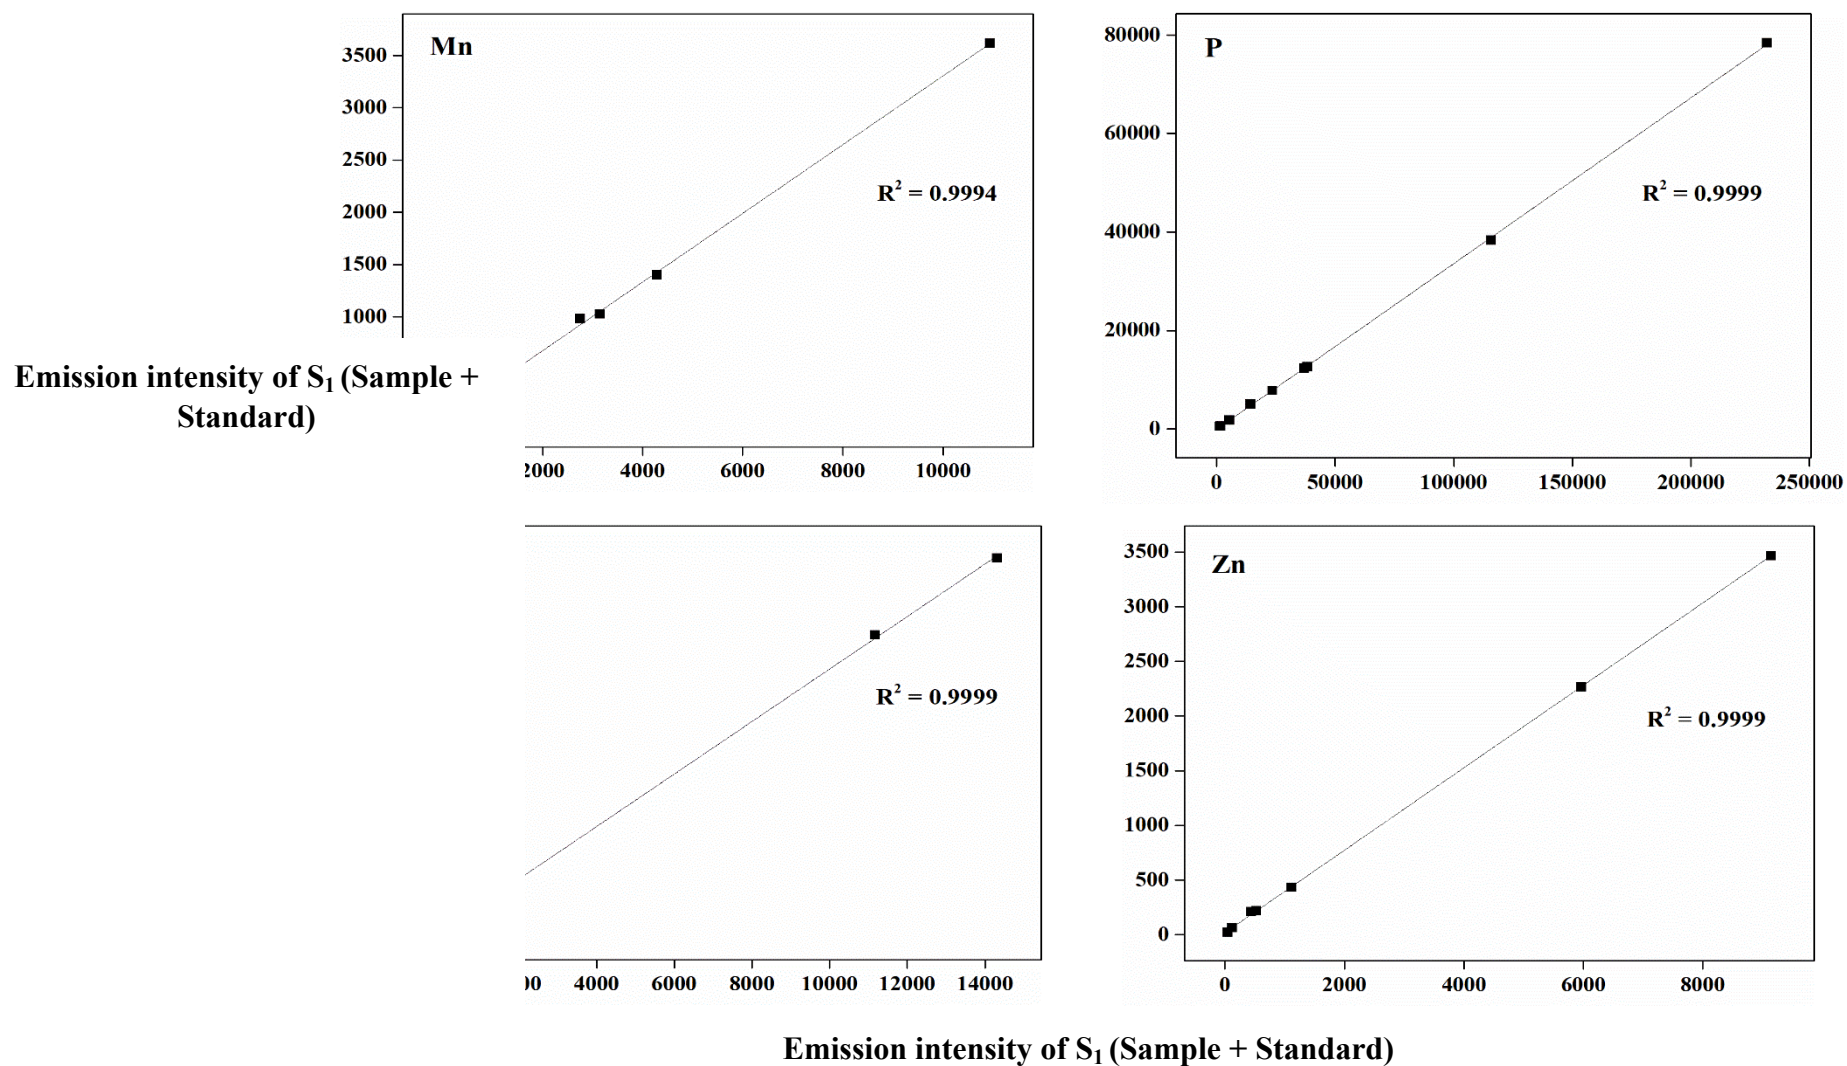

Figure S3. Calibration plots obtained from MEC-ICP OES for Mn, P, S, and Zn. Each x-y pair refers to a calibration point obtained by running S<sub>1</sub> and S<sub>2</sub> at the optimized conditions.

Table S1. Analytical figures of merit of the procedure for total mass fraction determination by ICP OES

| Analyte | LOD<br>(mg kg <sup>-1</sup> ww) | LOQ<br>(mg kg <sup>-1</sup> ww) | Precision<br>(% RSD) | Trueness                              |                                           |                      |                                       |                                           |                      |
|---------|---------------------------------|---------------------------------|----------------------|---------------------------------------|-------------------------------------------|----------------------|---------------------------------------|-------------------------------------------|----------------------|
|         |                                 |                                 |                      | CRM TORT-3                            |                                           |                      | CRM DOLT-5                            |                                           |                      |
|         |                                 |                                 |                      | Found value<br>(mg kg <sup>-1</sup> ) | Certified value<br>(mg kg <sup>-1</sup> ) | t <sub>calc.</sub> * | Found value<br>(mg kg <sup>-1</sup> ) | Certified value<br>(mg kg <sup>-1</sup> ) | t <sub>calc.</sub> * |
| Ca      | 9 – 13                          | 28 – 41                         | 1.1                  | 2415 ± 27                             | nc                                        | -                    | 577 ± 14                              | 550 ± 80                                  | 3.43                 |
| Cu      | 0.1                             | 0.3 – 0.4                       | 1.1                  | 478 ± 17                              | 497 ± 22                                  | 2.03                 | 35.3 ± 0.6                            | 35.0 ± 2.4                                | 0.98                 |
| Fe      | 0.1                             | 0.2 – 0.3                       | 3.5                  | 163 ± 7                               | 179 ± 8                                   | 3.76                 | 1114 ± 30                             | 1070 ± 80                                 | 2.55                 |
| Mg      | 17 – 24                         | 50 – 72                         | 0.7                  | 1105 ± 10                             | nc                                        | -                    | 924 ± 22                              | 940 ± 100                                 | 1.28                 |
| Mn      | 0.1                             | 0.2                             | 2.0                  | 14.3 ± 0.7                            | 15.6 ± 1.0                                | 3.34                 | 8.69 ± 0.20                           | 8.91 ± 0.70**                             | 1.91                 |
| P       | 201 – 287                       | 610 – 871                       | 1.0                  | 10621 ± 72                            | nc                                        | -                    | 11991 ± 210                           | 11500***                                  | 4.06                 |
| S       | 78 – 112                        | 237 – 338                       | 0.8                  | 15886 ± 245                           | nc                                        | -                    | 20688 ± 325                           | nc                                        | -                    |
| Zn      | 0.4 – 0.5                       | 1.1 – 1.5                       | 0.9                  | 130 ± 3                               | 136 ± 6                                   | 3.05                 | 106.3 ± 2.6                           | 105.3 ± 5.4                               | 0.65                 |
| As      | 0.1                             | 0.2                             | 1.8                  | 63.3 ± 4.8                            | 59.5 ± 3.8                                | 2.76                 | 32.3 ± 1.0                            | 34.6 ± 2.4                                | 3.20                 |

\*t<sub>calc.</sub> = calculated t-value at a 95 % of confidence level (t-critical = 4.30). nc = no certified. \*\* reference value. \*\*\* information value.

Table S2: Total dissolved solids in the chyme after *in vitro* digestion

| Component          | Concentration<br>(% m/v) | Final concentration in<br>the chyme (% m/v) |
|--------------------|--------------------------|---------------------------------------------|
| Pepsin             | 10                       | 0.16                                        |
| Pancreatin         | 0.2                      | 0.04                                        |
| Bile salts         | 1.3                      | 0.24                                        |
| NaHCO <sub>3</sub> | 0.8                      | 0.16                                        |
| NaOH               | 4.0                      | 0.16                                        |
| Sample             | -                        | 2.0*                                        |
|                    |                          | <b>TDS (%m/v) = 2.8</b>                     |

\* Assuming a sample dissolution of about 50 %.

Table S3. Mass balance study for raw and cooked shrimp.

| Element | Raw shrimp (mg kg <sup>-1</sup> dry-weight) |                        |                   |        | Cooked shrimp (mg kg <sup>-1</sup> dry-weight) |                        |                   |        |
|---------|---------------------------------------------|------------------------|-------------------|--------|------------------------------------------------|------------------------|-------------------|--------|
|         | Total mass fraction                         | Bioaccessible fraction | Residual fraction | MB (%) | Total mass fraction                            | Bioaccessible fraction | Residual fraction | MB (%) |
| Ca      | 4,094 ± 24                                  | 3,082 ± 137            | 687 ± 62          | 92     | 2,902 ± 43                                     | 2,291 ± 53             | 734 ± 26          | 104    |
| Cu      | 6.0 ± 0.1                                   | 3.2 ± 0.1              | 2.7 ± 0.2         | 98     | 4.3 ± 0.1                                      | 3.2 ± 0.2              | 1.2 ± 0.1         | 104    |
| Fe      | 39.4 ± 0.5                                  | 7.8 ± 0.2              | 23.5 ± 0.8        | 80     | 24.7 ± 0.3                                     | 6.7 ± 0.2              | 14.1 ± 0.9        | 84     |
| Mg      | 2,026 ± 20                                  | 1,559 ± 46             | 262 ± 19          | 90     | 1,251 ± 18                                     | 976 ± 11               | 161 ± 5           | 91     |
| Mn      | 4.7 ± 0.1                                   | 3.0 ± 0.1              | 1.3 ± 0.1         | 92     | 2.7 ± 0.1                                      | 1.7 ± 0.1              | 0.95 ± 0.08       | 98     |
| P       | 9,642 ± 135                                 | 7,502 ± 225            | 1,562 ± 103       | 94     | 6,062 ± 50                                     | 4,619 ± 72             | 834 ± 31          | 90     |
| S       | 12,723 ± 146                                | 8,312 ± 286            | 3,089 ± 154       | 90     | 8,384 ± 58                                     | 4,967 ± 40             | 2,771 ± 38        | 92     |
| Zn      | 56.3 ± 0.3                                  | 15.0 ± 0.2             | 40.0 ± 2.7        | 98     | 39.8 ± 0.2                                     | 5.9 ± 0.7              | 31.0 ± 0.6        | 93     |
| As      | 2.5 ± 0.1                                   | 1.9 ± 0.1              | 0.56 ± 0.03       | 97     | 1.7 ± 0.1                                      | 1.1 ± 0.1              | 0.35 ± 0.05       | 85     |

MB = mass balance
